# Supplementary material
Source: PubMed Central journal article supplement (PMC5891832)

Original Western Blots Scans

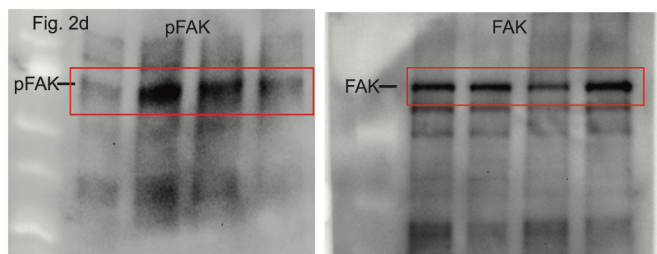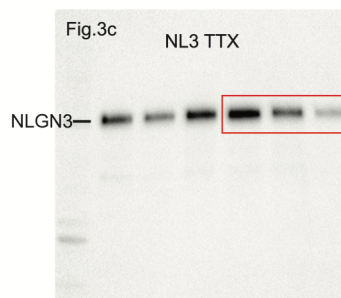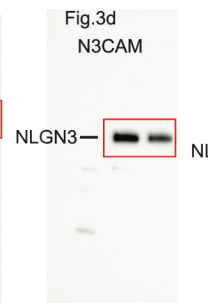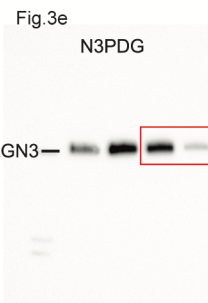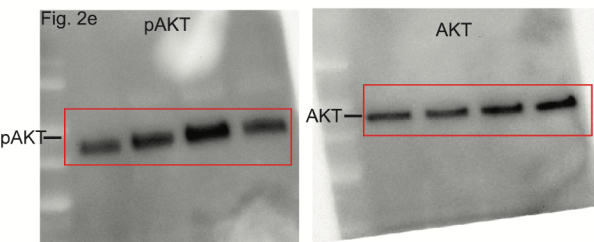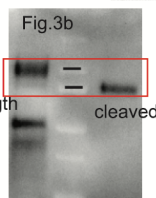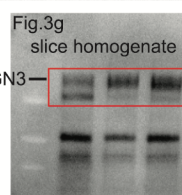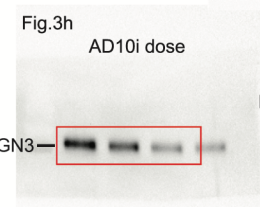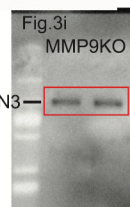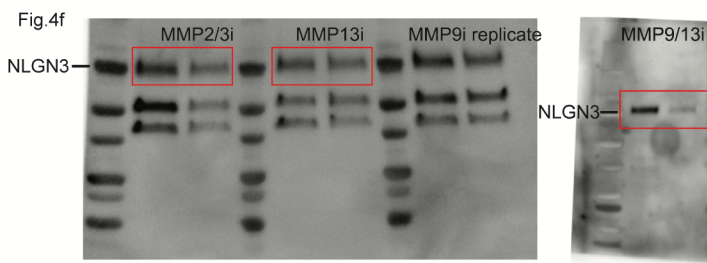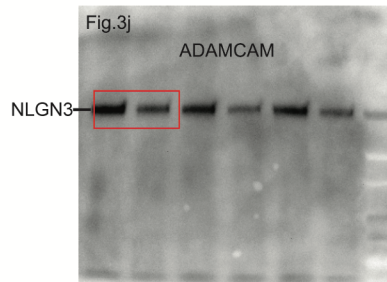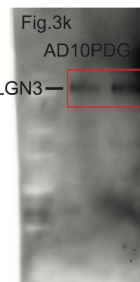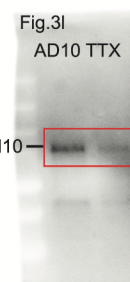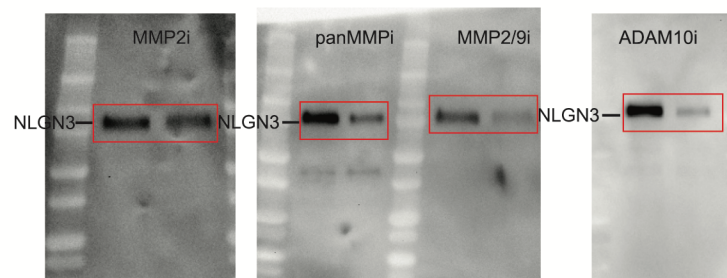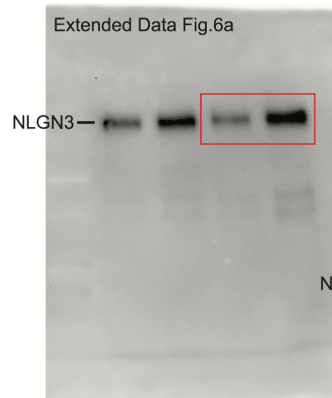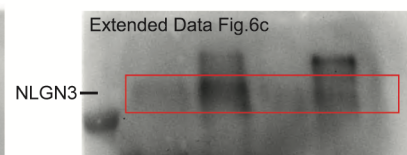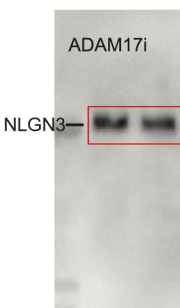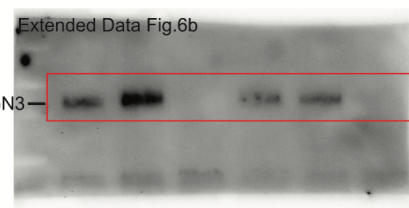

Supplement: NIHMS901523-supplement-Blot_scans.pdf [file NIHMS901523-supplement-Blot_scans.pdf]
